# Supplementary material for: Crx-L253X Mutation Produces Dominant Photoreceptor Defects in TVRM65 Mice
Source: PubMed Central journal article supplement — Invest Ophthalmol Vis Sci. 2017 Sep;58(11):4644–53. doi: 10.1167/iovs.17-22075 (PMC5597032; doi:10.1167/iovs.17-22075), 2017-09
Supplement: iovs-58-10-67_s01.pdf [file iovs-58-10-67_s01.pdf]

**Supplemental Table 1: Primer Sets for PCR and qRT-PCR**

| Primer Name                                  | Primer F                                         | Primer R                     | type    |
|----------------------------------------------|--------------------------------------------------|------------------------------|---------|
| <b>Genotyping Primers</b>                    |                                                  |                              |         |
| <i>TVRM65</i>                                | ACTACAAAGATCAGAGTGCCTGG                          | GCTATAGCTCTGGCCTGACT         | PCR     |
| <i>C57Bl6/J</i> (for <i>TVRM65</i> )         | ACTACAAAGATCAGAGTGCCTGG                          | CGACAGCAGAAACAGCA            | PCR     |
| <i>Crx</i> -/-                               | GCAGCGACAGCAGCAGAAACA                            | AGAAGCCGGGGCATAGGTCAT        | PCR     |
| ( <i>Rd8</i> ) <i>mCrb1</i> (mF1 R1)         | GTGAAGACAGCTACAGTTCTGATC                         | GCCCCATTTGCACACTGATGAC       | PCR     |
| ( <i>Rd8</i> ) <i>mCrb1</i> (mF2 R1)         | GCCCCTGTTTGCATGGAGGAAACTTGGAAGACAGCTACAGTTCTTCTG | GCCCCATTTGCACACTGATGAC       | PCR     |
| ( <i>Rd1</i> ) <i>mPde6b</i> (F <i>Rwt</i> ) | TGACAATTACTCCTTTTCCCTCAGTCTG                     | GTAACAGCAAGAGGCTTTATTGGGAAC  | PCR     |
| ( <i>Rd1</i> ) <i>mPde6b</i> (F <i>Rmt</i> ) | TGACAATTACTCCTTTTCCCTCAGTCTG                     | TACCCACCCCTCCTAATTTTTCTCACGC | PCR     |
| <b>qRT-PCR</b>                               |                                                  |                              |         |
| <i>mAbca4</i> RT                             | ACAATGTAGCCGTCTCCAAACTT                          | GTTCTCACTCCCACAGCAT          | q-RTPCR |
| <i>mArr3</i> RT                              | CAGGAGTTCACAGAGACAGTAGC                          | CCTTGTTCCATTCCAGGTCG         | q-RTPCR |
| <i>mCep290</i> RT                            | GCTGGTAGAAGTGGGAAGACA                            | TCAAAGTGCATACTCAACTGACG      | q-RTPCR |
| (total) <i>mCrx</i> Int/Ex4-F/R RT           | ACTACAAAGATCAGAGTGCCTGG                          | TAAAGGAGCTGAGGGTAGGAAAC      | q-RTPCR |
| <i>mGapdh</i> RT                             | CACTGCCACTGCCACCCAGAAGACTG                       | CCCTGTTGCTGTAGCCAAAT         | q-RTPCR |
| <i>mGnat1</i> RT                             | ACGATGGACCTAACACTTACGAGG                         | TGGAAAGGACGGTATTTGAGG        | q-RTPCR |
| <i>mGnat2</i> RT                             | AGTCAAGACAACAGGCATCATCG                          | TCACTTCGTCATCCTCCACCAG       | q-RTPCR |
| <i>mGrk1</i> RT                              | CGAGGAGACAAGGTAGAGAACAAGG                        | TCTGGGATGAATGGAGGAATGA       | q-RTPCR |
| <i>mElovl4</i> RT                            | AATCAAGTGGGTGGCTGGAG                             | AGTGCTGTGTGCCGATG            | q-RTPCR |
| <i>mMop</i> RT                               | GGTGGTGATGGTCTTCGCATAC                           | TTGGAGGTGCTGGAAAGTTCA        | q-RTPCR |
| <i>mNrl</i> RT                               | TTCTGGTCTGACAGTGACTAGG                           | AAGGCTCCCGCTTTATTTT          | q-RTPCR |
| <i>mOtx2</i> RT                              | ACTTGGCACAATCCAGGGTG                             | TGAGCCAGGATAGCCTTGAC         | q-RTPCR |
| <i>mPde6b</i> RT                             | CAAGAAAGTGGGCACAGAAG                             | ATAGGCAGAGTCCGTATGC          | q-RTPCR |
| <i>mPde6g</i> RT                             | GCAAGGGTTTGGGGATGACA                             | CGTGCAGCTCTAGGTGATTGAA       | q-RTPCR |
| <i>mPde6h</i> RT                             | ACGGGAACACATTCCGGCTC                             | CCAGATGGGTGAACGCTTC          | q-RTPCR |
| <i>mPrph2</i> RT                             | CACTACAGCTATGACCATCAGACT                         | GGGTTAGACACTCTCCAGC          | q-RTPCR |
| <i>mRbp3</i> RT                              | CCAGAGGATGCCAAAGAGCG                             | CTTCCAGATGTGTTCTACCAGCA      | q-RTPCR |
| <i>mRdh8</i> RT                              | GTTATGGGGCTTCAGGGTGT                             | GTTTTCTTCAAAGTCAGTGGTGA      | q-RTPCR |
| <i>mRdh12</i> RT                             | GGCCAATCTGCTCTTCACTC                             | CCCCTGAGAAGTGGACTTGA         | q-RTPCR |
| <i>mRho</i> RT                               | GCTTCCCTACGCCAGTGTG                              | CAGTGGATTCTTGCCGCAG          | q-RTPCR |
| <i>mRom1</i> RT                              | CATGGCTACAAGGATTGGTTTGG                          | TCAAAGTGCATACTCAACTGACG      | q-RTPCR |
| <i>mRxrg</i> RT                              | CGTGGAGAAGTCAACAAATGACCC                         | TGGATAAACCCCTTGGCATCTG       | q-RTPCR |
| <i>mSag</i> RT                               | TGAACCTCTCAGTCTCCCTCA                            | AGGCTACAGGCTTGACGTAATAG      | q-RTPCR |
| <i>mSop</i> RT                               | GCTGGACTTACGGCTTGTCAAC                           | TGTGGGGTTGTGTTTGTCTGG        | q-RTPCR |
| <i>mTuba1B</i> RT                            | CAAGCTGGAGTCTCCATTTAC                            | GTGATAGATGGCCTCATTGTCT       | q-RTPCR |
| <i>mTulp1</i> RT                             | CGCTGTGGTCTATGAAACCAAT                           | TGTAGGAGCCACTGTCTTCATT       | q-RTPCR |
| <i>mUbb</i> RT                               | CAACATCCAGAAAGAGTCAACC                           | ATGTTGTAATCAGAGAGGGTGC       | q-RTPCR |
