# Supplementary material for: Crx-L253X Mutation Produces Dominant Photoreceptor Defects in TVRM65 Mice
Source: PubMed Central journal article supplement — Invest Ophthalmol Vis Sci. 2017 Sep;58(11):4644–53. doi: 10.1167/iovs.17-22075 (PMC5597032; doi:10.1167/iovs.17-22075), 2017-09
Supplement: iovs-58-10-67_s02.pdf [file iovs-58-10-67_s02.pdf]

**Supplemental Table 2: Custom designed ddPCR assays**

| Allele Name          | Catolog#           | Company | Type  |
|----------------------|--------------------|---------|-------|
| <i>TVRM65 Mutant</i> | <b>cat10031279</b> | BioRad  | ddPCR |
| <i>TVRM65 Normal</i> | <b>cat10031276</b> | BioRad  | ddPCR |
