# Supplementary material for: Crx-L253X Mutation Produces Dominant Photoreceptor Defects in TVRM65 Mice
Source: PubMed Central journal article supplement — Invest Ophthalmol Vis Sci. 2017 Sep;58(11):4644–53. doi: 10.1167/iovs.17-22075 (PMC5597032; doi:10.1167/iovs.17-22075), 2017-09
Supplement: iovs-58-10-67_s03.pdf [file iovs-58-10-67_s03.pdf]

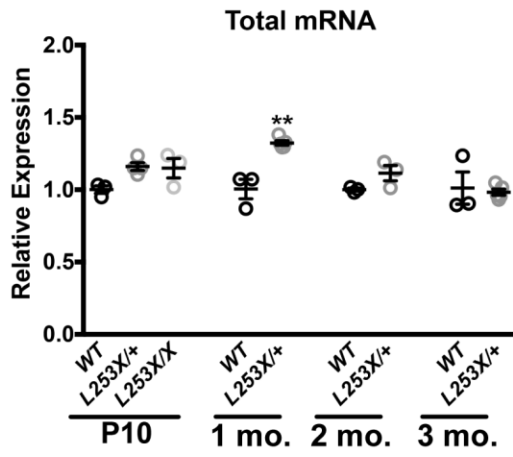

Supplemental Figure 1

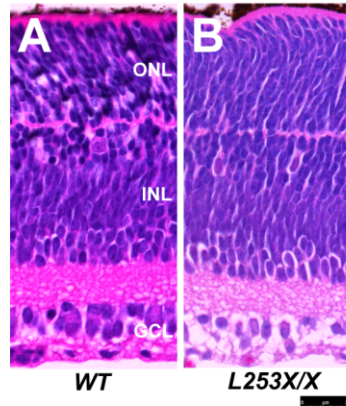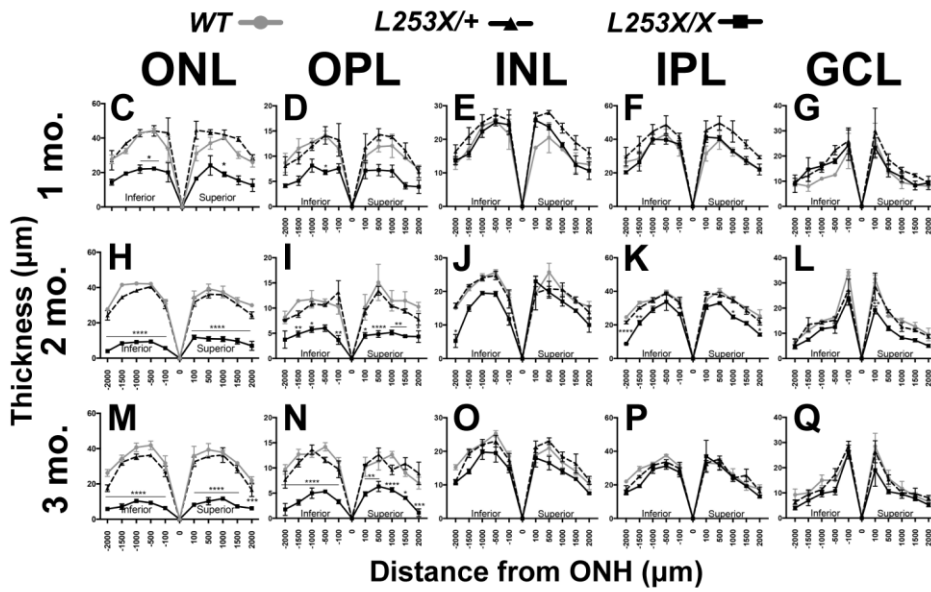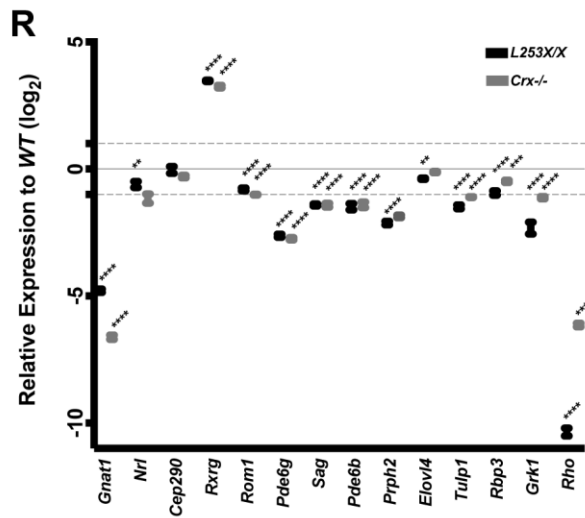

Supplemental Figure 2

**Supplemental Figure 1: *L253X/+* retinas display variable excess total *Crx* mRNA.**

qRT-PCR assays were used to quantify total *Crx* mRNA from mutant and *WT* control retinas at the indicated ages. The results are presented as relative expression to *WT*. (mean  $\pm$  SEM, n=3, circles represent individual biological replicates; \*\*  $p < .01$ ; 1-Way Anova with Tukey's Multiple Comparisons Test).

**Supplemental Figure 2: *L253X/X* retinas display normal ONL genesis but photoreceptor layer-specific progressive thinning, while all *L253X/+* retinal layers unaffected.**

H&E stained retinal sections from P7 *WT* (A) and *L253X/X* (B) mice were imaged at 40X magnification (scale bar 25 $\mu$ m). Morphometry quantification of five retinal layers in *L253X/X* and *L253X/+* mutants along with *WT* controls at 1 mo (C-G), 2 mo (H-L) and 3 mo (M-Q). These layers include ONL-outer nuclear layer, OPL-outer plexiform layer; INL-inner nuclear layer; IPL-inner plexiform layer; and GCL- ganglion cell layer. (mean  $\pm$  SEM, n  $\geq$  3; \*  $p < 0.05$ , \*\*  $p < 0.01$ , \*\*\*  $p < 0.001$ , \*\*\*\*  $p < 0.0001$ ; 2-Way Anova with Tukey's Multiple Comparisons Test). (R) Expression levels of 14 essential photoreceptor genes in P10 *L253X/X* and *Crx*<sup>-/-</sup> mutants and *WT* controls were determined by qRT-PCR. The results are presented as expression changes relative to *WT* in a log<sub>2</sub> scale with 2-fold differences ( $\pm 1$ ) marked by grey dash lines (mean  $\pm$  SEM, n  $\geq$  3; \*  $p < 0.05$ , \*\*  $p < 0.01$ , \*\*\*\*  $p < 0.0001$ ; 1-Way Anova with Tukey's Multiple Comparisons Test)

**Supplemental Table 1: Primer sets for PCR and qRT-PCR.**

**Supplemental Table 2: Custom designed ddpCR assays.**
